# Supplementary material for: Nanoporous Cauliflower-like Pd-Loaded Functionalized Carbon Nanotubes as an Enzyme-Free Electrocatalyst for Glucose Sensing at Neutral pH: Mechanism Study
Source: MDPI journal article supplement (doi:10.3390/s22072706), 2022-04-01
Supplement: s1 [file s1]

## Supplementary Materials

# Nanoporous Cauliflower-like Pd-Loaded Functionalized Carbon Nanotubes as an Enzyme-free Electrocatalyst for Glucose Sensing at Neutral pH: Mechanism Study

Abdelghani Ghanam <sup>1,2</sup>, Naoufel Haddour <sup>2</sup>, Hasna Mohammadi <sup>1</sup>, Aziz Amine <sup>1,\*</sup>, Andrei Sabac <sup>2</sup> and François Buret <sup>2</sup>

<sup>1</sup> Chemical Analysis and Biosensors Group, Laboratory of Process Engineering and Environment, Faculty of Science and Techniques, Hassan II University of Casablanca, B.P 146, Mohammedia, Morocco; abdelghani.ghanam@ec-lyon.fr (A.G.)

<sup>2</sup> Laboratoire Ampère, Ecole Centrale de Lyon, Université de Lyon, CNRS, UMR 5005, 69130 Ecully, France; naoufel.haddour@ec-lyon.fr (N.H.)

\* Correspondence: a.amine@univh2m.ac.ma; Tel.: +212-661-455198; Fax.: +212-523-315353

**Keywords:** cauliflower-like Pd, enzyme-free electrocatalyst, glucose, mechanism, electrodeposition, functionalized carbon nanotube

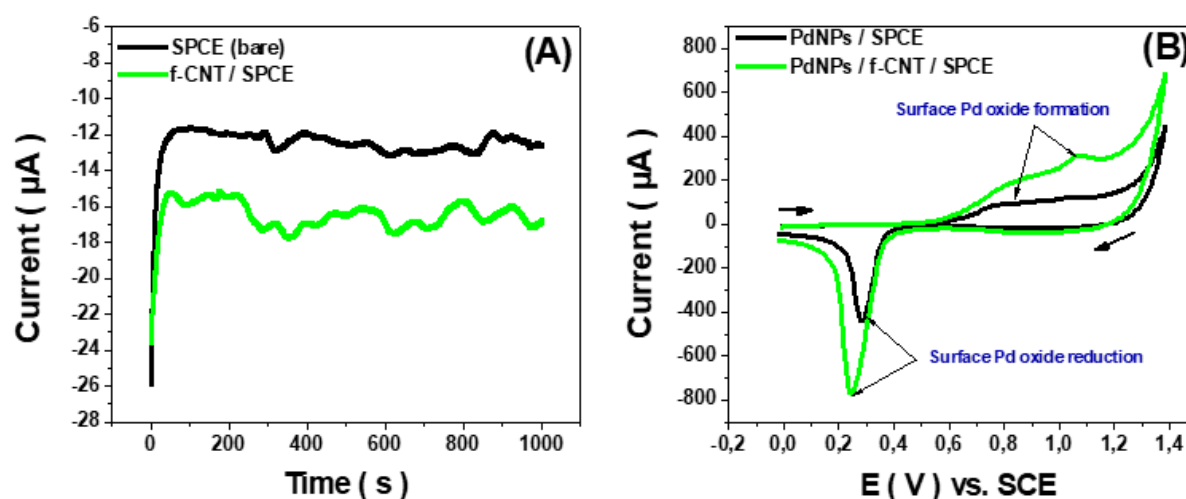

**Figure S1.** (A) electrodeposition chronoamperograms of PdNS under -0.2 V vs. SCE for 1000 s in a 0.05 M HClO<sub>4</sub> and 0.25 M H<sub>2</sub>SO<sub>4</sub> solution containing 1 mM Pd<sup>2+</sup> over bare SPCE (**black line**) and f-CNT/SPCE (**green line**). (B) First scan, of five successive scans, related to the polarization of PdNS modified SPCE and f-CNTs/SPCE recorded by CVs in 0.5 M H<sub>2</sub>SO<sub>4</sub> solution, scan rate 100 mV s<sup>-1</sup>.

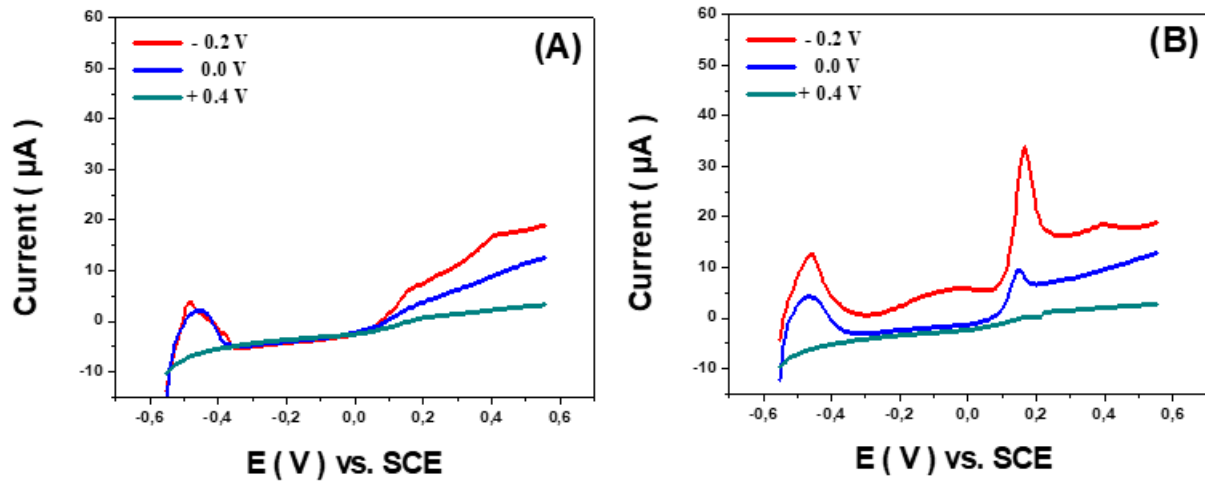

**Figure S2.** LSVs at PdNS/f-CNT/SPCE recorded after Pd electrodeposition at -0.2, 0.0, and +0.4 V vs. SCE in 0.1 M PBS (pH 7.4) without (A) and in the presence of 20 mM of glucose (B). Scan rate 10 mV s<sup>-1</sup>

### 1.1. Effect of Electrodeposition Potential

This approach uses the value of 0.424 mC cm<sup>-2</sup> as the charge density associated with the reduction of one monolayer of PdO. However, knowing the potential range corresponding accurately to the formation of one monolayer of PdO in a cyclic voltammetry transient is highly recommended for applying this methodology [1,2]. Indeed, the real surface area of the PdNS could be calculated by evaluating the charge consumed during PdO electroreduction in the cathodic scan [2,3]. Therefore, the real surface area (RSA) can be estimated using the following equation:

$$RSA = \frac{Q_{red}^O}{\theta_O Q_{red,ML,S}^O}$$

where  $Q_{red}^O$  represents the charge required for oxygen adsorption,  $\theta_O$  is the surface coverage with surface oxide (adsorbed oxygen) and  $Q_{red,ML,S}^O$  is the charge due to the reduction of a monolayer (ML) of surface oxide per unit area (0.424 mC cm<sup>-2</sup>). As previously reported, the values of  $Q_{red}^O$  and  $\theta_O$  depend on the potential of electrode polarization and the time scale of the experiment, i.e. scan rate (mV s<sup>-1</sup>) in voltammetric measurements [3].

Indeed, cyclic voltammetry profiles were performed at a scan rate of 100 mV s<sup>-1</sup> to illustrate PdO formation and reduction. Thereafter,  $Q_{red}^O$  was calculated on the basis of the integral discharge area of PdO formation during the cathodic scan on these CV profiles.

### 1.2. Mechanism Proposed for Glucose Oxidation on PdNS Catalyst in Neutral pH

Figure S3 shows the E-pH equilibrium diagram for the system Pd-water at 25°C, adapted from M. Pourbaix, Atlas of Electrochemical Equilibria in Aqueous Solution [4], and their corresponding theoretical reactions.

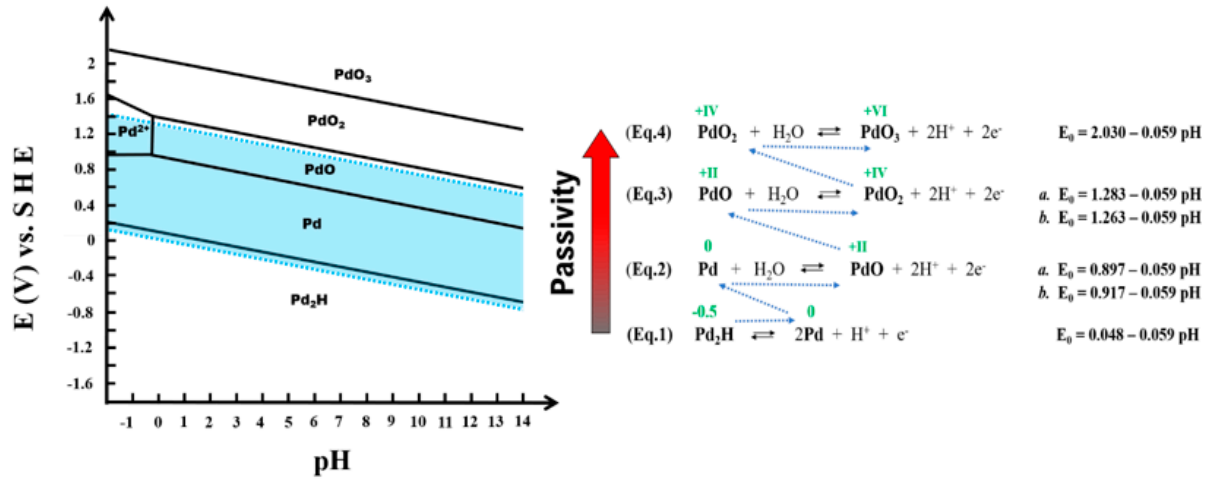

**Figure S3.** E-pH equilibrium diagram for the system Pd-water, at 25 °C, adapted from M. Pourbaix, Atlas of Electrochemical Equilibria in Aqueous Solution [4], and their corresponding theoretical reactions and equilibrium formulas.

The potentials in the Pourbaix diagram are expressed with respect to a standard hydrogen electrode (SHE). However, the values found are converted to be versus a saturated calomel electrode (SCE), saturated with 3M KCl, and presented as follows:

$$E(\text{PdO}_3/\text{PdO}_2) = 2.030 - 0.0591 \text{ pH} = 1.593 \text{ vs. SHE} = +1.353 \text{ vs. SCE} \quad (1)$$

$$E(\text{PdO}_2/\text{PdO})^a = 1.283 - 0.0591 \text{ pH} = 0.846 \text{ vs. SHE} = +0.606 \text{ vs. SCE} \quad (2)$$

$$E(\text{PdO}_2/\text{PdO})^b = 1.263 - 0.0591 \text{ pH} = 0.826 \text{ vs. SHE} = +0.586 \text{ vs. SCE}$$

$$E(\text{PdO}/\text{Pd})^a = 0.897 - 0.0591 \text{ pH} = 0.46 \text{ vs. SHE} = +0.22 \text{ vs. SCE} \quad (3)$$

$$E(\text{PdO}/\text{Pd})^b = 0.917 - 0.0591 \text{ pH} = 0.48 \text{ vs. SHE} = +0.24 \text{ vs. SCE}$$

$$E(\text{Pd}/\text{Pd}_2\text{H}) = 0.048 - 0.0591 \text{ pH} = -0.389 \text{ vs. SHE} = -0.629 \text{ vs. SCE} \quad (4)$$

In Equation (2), involving PdO, the letter **(a)** refers to hydrated PdO or palladous hydroxide Pd(OH)<sub>2</sub>, whereas the letter **(b)** refers to anhydrous PdO [4]. Besides, the Pd(II) oxides are reported to be either anhydrous PdO or hydrous, i.e., Pd(OH)<sub>2</sub>, PdO·H<sub>2</sub>O, or Pd(OH)<sub>2</sub>·H<sub>2</sub>O. Elsewhere, it was proposed that hydrous Pd oxides can be formed in acidic, basic, and neutral electrolytes; most of these conclusions are based only on the analysis of cyclic voltammetry profiles, and in some, they are also supported by other techniques [1].

## References

1. Grdeń, M.; \Lukaszewski, M.; Jerkiewicz, G.; Czerwiński, A. Electrochemical Behaviour of Palladium Electrode: Oxidation, Electrodissolution and Ionic Adsorption. *Electrochimica Acta* **2008**, *53*, 7583–7598.
2. Rand, D.A.J.; Woods, R. The Nature of Adsorbed Oxygen on Rhodium, Palladium and Gold Electrodes. *J. Electroanal. Chem. Interfacial Electrochem.* **1971**, *31*, 29–38.
3. Lukaszewski, M.; Soszko, M.; Czerwiński, A. Electrochemical Methods of Real Surface Area Determination of Noble Metal Electrodes—an Overview. *Int J Electrochem Sci* **2016**, *11*, 4442–4469.
4. Pourbaix, M. Atlas of Electrochemical Equilibria in Aqueous Solution. *NACE* **1974**, 307.
